# Supplementary material for: hENT1 Testing in Pancreatic Ductal Adenocarcinoma: Are We Ready? A Multimodal Evaluation of hENT1 Status
Source: PubMed Central journal article supplement (PMC6896053; doi:10.3390/cancers11111808), 2019-11-18
Supplement: cancers-11-01808-s001.pdf [file cancers-11-01808-s001.pdf]

# Supplementary Materials: hENT1 Testing in Pancreatic Ductal Adenocarcinoma: Are We Ready? A Multimodal Evaluation of hENT1 Status

Jerome Raffenne, Remy Nicolle, Francesco Puleo, Delphine Le Corre, Camille Boyez, Raphael Marechal, Jean François Emile, Peter Demetter, Armelle Bardier, Pierre Laurent-Puig, Louis de Mestier, Valerie Paradis, Anne Couvelard, Jean Luc VanLathem, John R. MacKey, Jean-Baptiste Bachet, Magali Svrcek and Jerome Cros

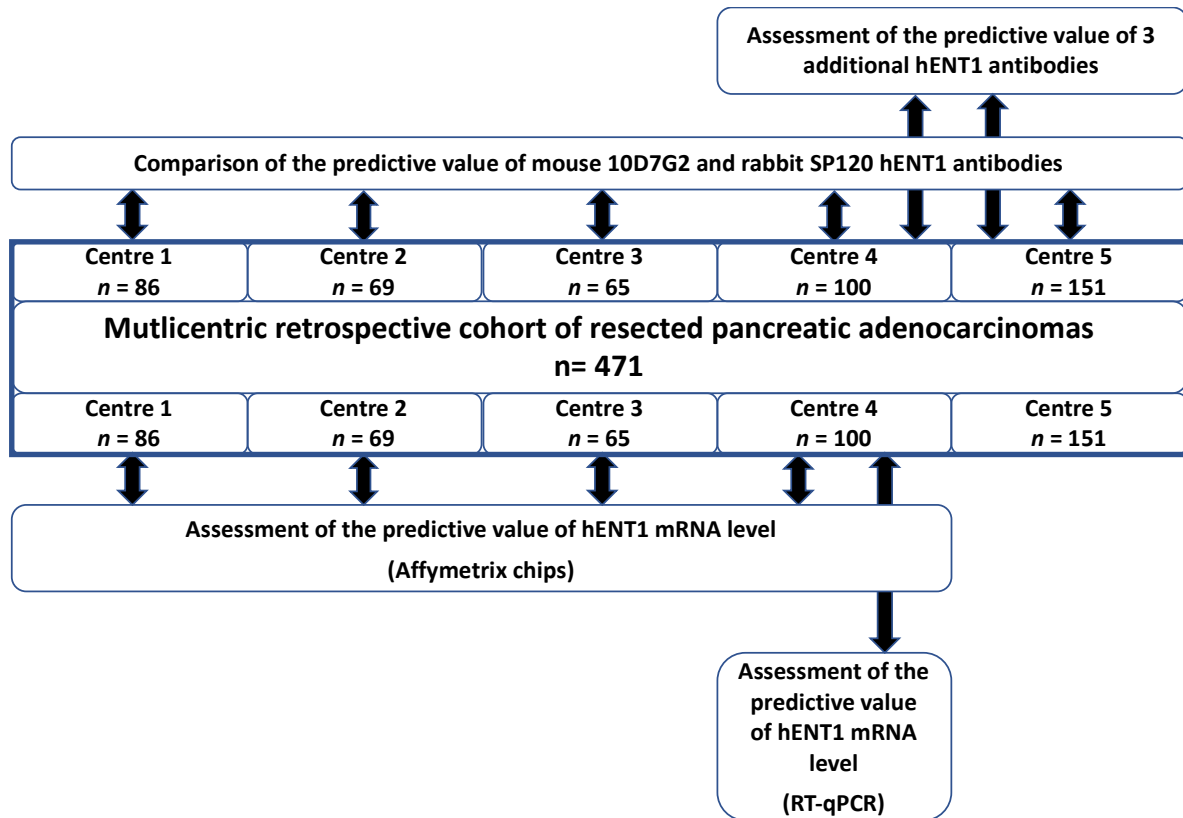

Figure S1. Flow chart of the study.

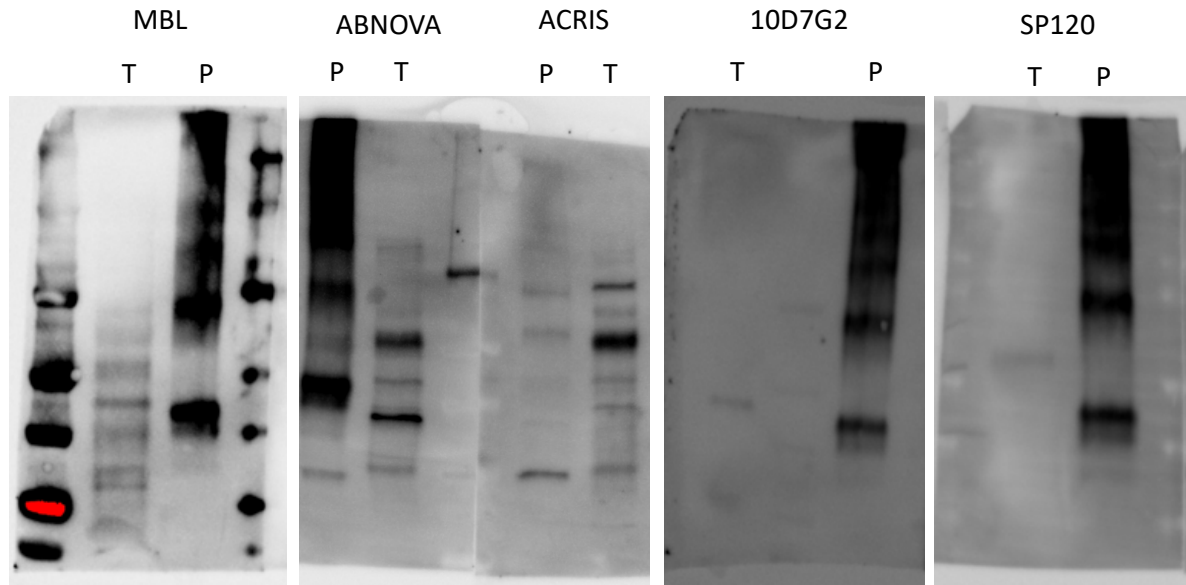

Figure S2. Raw complete membranes of the Western blot presented in Figure 2d.

Table S1. Patient characteristics in the whole cohort and according to the treatment.

| Variables                 | No Gemcitabine-Based Therapy<br>(n = 191) | Gemcitabine-Based Therapy<br>(n = 243) | All (n = 434) | p value<br>$\chi^2$ test |
|---------------------------|-------------------------------------------|----------------------------------------|---------------|--------------------------|
| Center                    |                                           |                                        |               |                          |
| 1                         | 29 (15.2)                                 | 39 (16.1)                              | 68 (15.7)     | 0.327                    |
| 2                         | 33 (17.3)                                 | 35 (14.4)                              | 68 (15.7)     |                          |
| 3                         | 69 (36.1)                                 | 78 (32.1)                              | 147 (33.9)    |                          |
| 4                         | 20 (10.5)                                 | 42 (17.3)                              | 62 (14.3)     |                          |
| 5                         | 40 (20.9)                                 | 49 (20.2)                              | 89 (20.5)     |                          |
| Sex                       |                                           |                                        |               |                          |
| Female                    | 84 (44)                                   | 114 (46.9)                             | 198 (45.6)    | 0.542                    |
| Male                      | 107 (56)                                  | 129 (53.1)                             | 236 (54.4)    |                          |
| Race                      |                                           |                                        |               |                          |
| White                     | 185 (96.8)                                | 234 (96.3)                             | 419 (96.5)    | 0.95                     |
| Black                     | 4 (2.1)                                   | 6 (2.6)                                | 10 (2.3)      |                          |
| Other                     | 2 (1.1)                                   | 3 (1.1)                                | 5 (1.2)       |                          |
| Surgery                   |                                           |                                        |               |                          |
| Duodenopancreatectomy     | 165 (86.4)                                | 213 (87.7)                             | 378 (87.1)    | 0.06                     |
| Distal pancreatectomy     | 24 (12.6)                                 | 20 (8.2)                               | 44 (10.1)     |                          |
| Total pancreatectomy      | 2 (1.1)                                   | 10 (4.1)                               | 12 (2.8)      |                          |
| Resection margins         |                                           |                                        |               |                          |
| R0                        | 160 (85.1)                                | 188 (77.7)                             | 348 (80.9)    | 0.052                    |
| R1                        | 28 (14.9)                                 | 54 (22.3)                              | 82 (19.1)     |                          |
| Tumor differentiation     |                                           |                                        |               |                          |
| Well differentiated       | 88 (48.1)                                 | 99 (41.8)                              | 187 (44.5)    | 0.433                    |
| Moderately differentiated | 72 (39.3)                                 | 104 (43.9)                             | 176 (41.9)    |                          |
| Poorly differentiated     | 23 (12.6)                                 | 34 (14.4)                              | 57 (13.6)     |                          |
| Tumor stage               |                                           |                                        |               |                          |
| T1/T2                     | 37 (19.4)                                 | 39 (16.1)                              | 76 (17.5)     | 0.366                    |
| T3                        | 154 (80.6)                                | 204 (84)                               | 358 (82.5)    |                          |
| Lymph nodes Negativ       |                                           |                                        |               |                          |
| Negative, N0              | 60 (31.4)                                 | 56 (23.1)                              | 116 (26.7)    | 0.051                    |
| Positive, N1              | 131 (68.6)                                | 187 (77)                               | 318 (73.3)    |                          |
| Tumor size (mm)           |                                           |                                        |               |                          |
| ≤30                       | 116 (64.1)                                | 126 (56)                               | 242 (59.6)    | 0.099                    |

|                                 |            |             |             |
|---------------------------------|------------|-------------|-------------|
| >30                             | 65 (35.9)  | 99 (44)     | 164 (40.4)  |
| Median (minimum/maximum)        | 30 (7/100) | 30 (10/150) | 30 (7/150)  |
| Mean (SD)                       | 31.2 (15)  | 33.5 (16.2) | 32.5 (15.7) |
| Treatment regimens              |            |             |             |
| Gem monotherapy 6 mo            |            | 103 (42.4)  |             |
| Gem 4 mo followed by RT + 5-FU  |            | 11 (4.5)    |             |
| Gem 3 mo followed by RT + 5-FUc |            | 80 (32.9)   |             |
| Gem 2 mo followed by RT + gem   |            | 14 (5.8)    |             |
| Gem and oxaliplatin 3 mo        |            | 35 (14.4)   |             |

All values are expressed as *n* (%) unless otherwise noted. RT, radiation therapy; 5-FU, 5-fluorouracil; Gem: gemcitabine

**Table S2.** Sample description of the paired primary tumor-metastase(s) cohort.

| Paired Primary Tumor-Metastase(s) |  | <i>n</i> = 54 |
|-----------------------------------|--|---------------|
| Primary tumor obtained from       |  |               |
| pancreatectomy (surgery)          |  | 29 (54%)      |
| FNA                               |  | 20 (37%)      |
| autopsy                           |  | 5 (9%)        |
| Metastases obtained from          |  |               |
| surgical resection                |  | 9 (17%)       |
| FNA/biopsy                        |  | 40 (74%)      |
| autopsy                           |  | 5 (9%)        |
| Synchronous                       |  | 32 (59%)      |
| Metachonous                       |  | 22 (41%)      |

**Table S3.** Antibodies used in the study.

| Antibodies          | Clone/Ref | Species    | Suppliers | Dilution Factor   |       |        |
|---------------------|-----------|------------|-----------|-------------------|-------|--------|
|                     |           |            |           | IHC               | WB    |        |
| hENT1               | 10D7G2    | -          | murine    | Gift of Mackey JR | 1/2   | 1/200  |
|                     | SP120     | M4200      | rabbit    | Spring Bioscience | 1/50  | 1/1000 |
|                     | -         | PAB2255    | rabbit    | Abnova            | 1/100 | 1/500  |
|                     | -         | MC-9777    | rabbit    | MBL               | 1/500 | 1/500  |
|                     | F12       | Fsc-377283 | murine    | Santa Cruz        | 1/100 | 1/1000 |
|                     | -         | 11337-1-AP | murine    | Acris             | 1/50  | 1/1000 |
| HRP Anti-Mouse IgG  | -         | ab131368   | rat       | Abcam             | -     | 1/2000 |
| HRP Anti-rabbit IgG | -         | 7074S      | goat      | Cell signaling    | -     | 1/2000 |

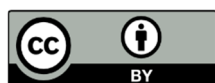

© 2019 by the authors. Licensee MDPI, Basel, Switzerland. This article is an open access article distributed under the terms and conditions of the Creative Commons Attribution (CC BY) license (<http://creativecommons.org/licenses/by/4.0/>).
